# Supplementary material for: Pd–H elimination reactions in palladium(ii) allylic complexes
Source: Royal Society of Chemistry journal article supplement (doi:10.1039/b706817d), 2007-01-01

## Supplementary Material

### Pd–H Elimination Reactions in Palladium(II) Allylic Complexes

*Ana C. Albéniz,\* Pablo Espinet,\* and Blanca Martín–Ruiz.*

#### Contents:

1- Additional data for the decomposition reactions of allylic complexes.

Table 1. Decomposition data for the palladium cyclohexenyl complexes at 50 °C.

Table 2. Decomposition data for complexes **1** and **4** at 100 °C.

2- NMR spectra of decomposition mixtures for complexes **5** and **6** (five figures).

Additional data for the decomposition reactions of allylic complexes.

**Table 1.** Decomposition data for the palladium cyclohexenyl complexes at 50 °C.<sup>a</sup>

| Entry | Complex                | 2h     |    |    |    |    | 1 day |        |    |   |    |    |
|-------|------------------------|--------|----|----|----|----|-------|--------|----|---|----|----|
|       |                        | Pd-cpd | 8  | 9  | 10 | 11 | 12    | Pd-cpd | 8  | 9 | 10 | 11 |
| 1     | <b>3</b>               |        |    |    |    |    | 100   |        |    |   |    |    |
| 2     | <b>4</b>               |        |    |    |    |    | 100   |        |    |   |    |    |
| 3     | <b>1</b>               |        |    |    |    |    | 100   |        |    |   |    |    |
| 4     | <b>6<sup>b,c</sup></b> |        |    |    |    |    | 42    | 2      | 13 | 4 |    | 12 |
| 5     | <b>7</b>               |        |    |    |    |    | 95    |        |    | 2 |    | 3  |
| 6     | <b>5<sup>d</sup></b>   |        | 30 | 31 | 31 |    |       |        |    |   |    |    |
| 7     | <b>2<sup>c</sup></b>   |        |    |    |    |    | 79    | 1      | 2  |   | 9  |    |

a) All the decomposition reactions were carried at 50 °C in CDCl<sub>3</sub> in an NMR tube. Percentages of products were determined by integration of signals in the <sup>19</sup>F spectra; they correspond to the percentage of C<sub>6</sub>F<sub>5</sub> in the compound which is equivalent to the molar % except for the dimeric complex **1**. b) Complex **1** was also formed (18%). c) Several unidentified compounds were also formed (9% total). d) Several Pf-containing unidentified compounds were also formed (8% total). C<sub>6</sub>Cl<sub>2</sub>F<sub>3</sub>H (50%) and [Pd(C<sub>6</sub>Cl<sub>2</sub>F<sub>3</sub>)<sub>2</sub>L<sub>2</sub>] (50%, L = solvent or H<sub>2</sub>O) were also formed.

**Table 2.** Decomposition data for the complexes **1** and **4** at 100 °C.<sup>a</sup>

| Entry | Complex              | 2h <sup>b</sup> |   |   |    |    | 1 day |        |    |    |    |    |    |
|-------|----------------------|-----------------|---|---|----|----|-------|--------|----|----|----|----|----|
|       |                      | Pd-cpd          | 8 | 9 | 10 | 11 | 12    | Pd-cpd | 8  | 9  | 10 | 11 | 12 |
| 1     | <b>1</b>             | 100             |   |   |    |    | 50    | 8      | 11 | 9  | 22 |    |    |
| 2     | <b>4<sup>c</sup></b> | 100             |   |   |    |    |       | 6      | 12 | 22 |    | 38 |    |

a) Decomposition reactions were carried at 100 °C in CDCl<sub>2</sub>CDCl<sub>2</sub> in an NMR tube. Percentages of products were determined by integration of signals in the <sup>19</sup>F spectra; they correspond to the percentage of C<sub>6</sub>F<sub>5</sub> in the compound which is equivalent to the molar % except for the dimeric complex **1**. b) The same results are obtained after 3.5 h. c) Several unidentified compounds were also formed.

NMR spectra of decomposition mixtures for complexes **5** and **6**.

Decomposition mixture of cpd. **5** after 1 day at 50 °C

$^{19}\text{F}$  NMR spectrum in  $\text{CDCl}_3$

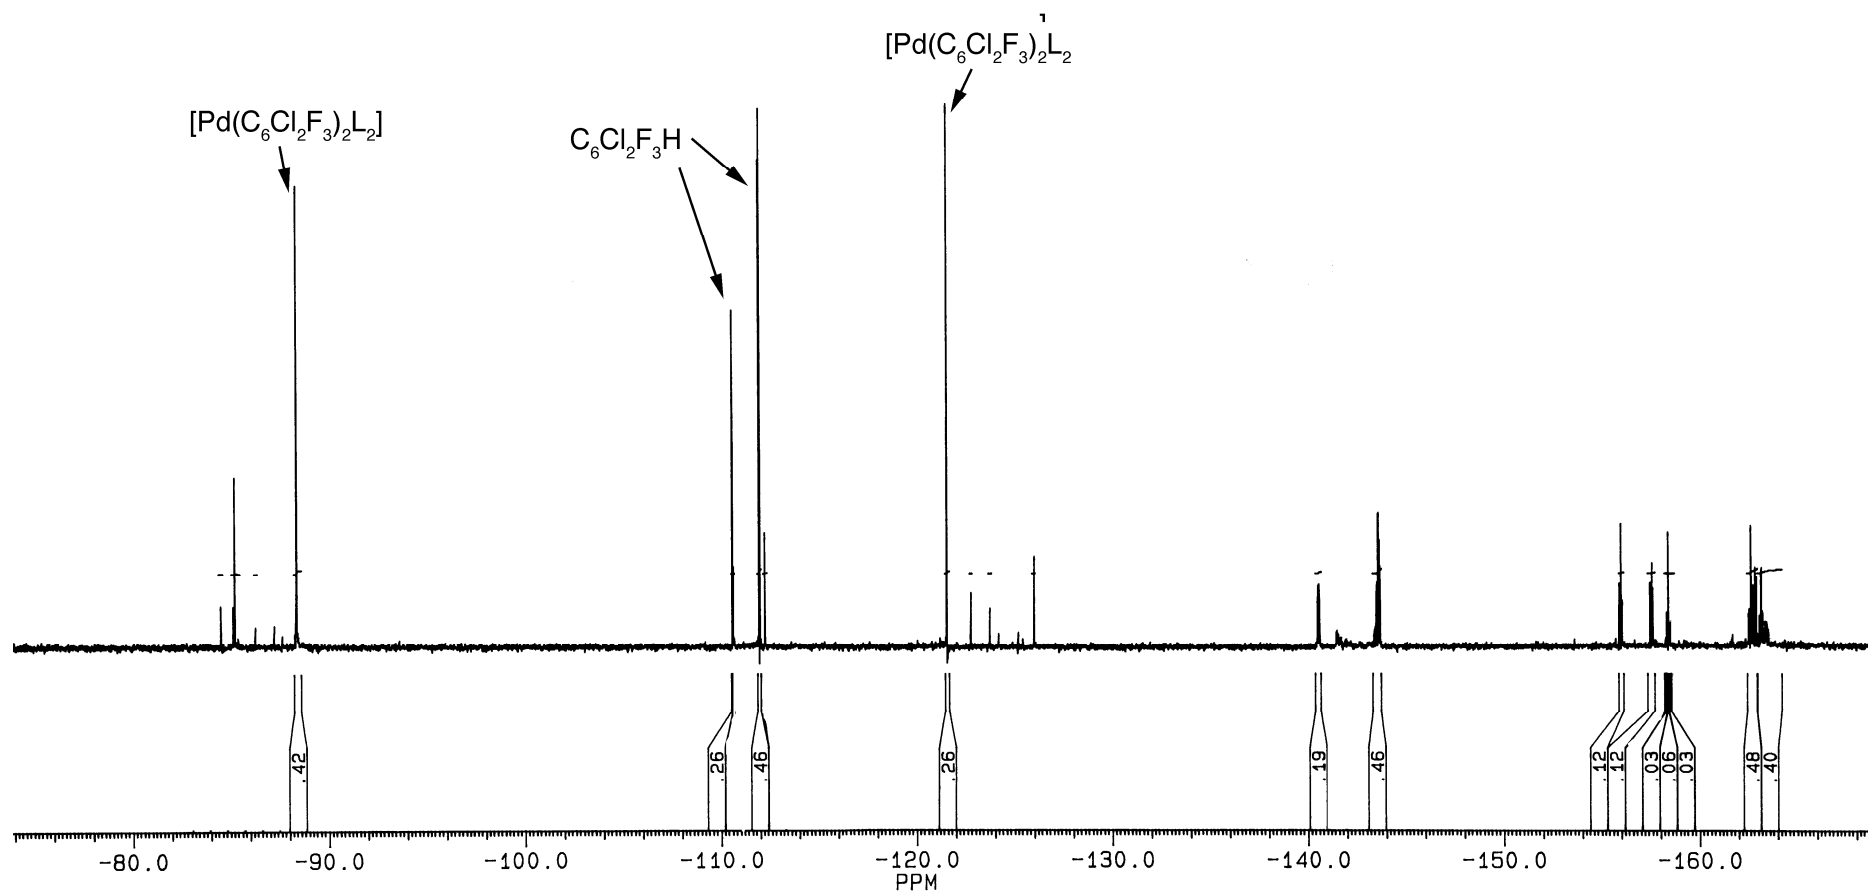

Decomposition mixture of cpd. **5** after 1 day at 50 °C  
 $^{19}\text{F}$  NMR spectrum ( $\text{C}_6\text{F}_5$  region) in  $\text{CDCl}_3$

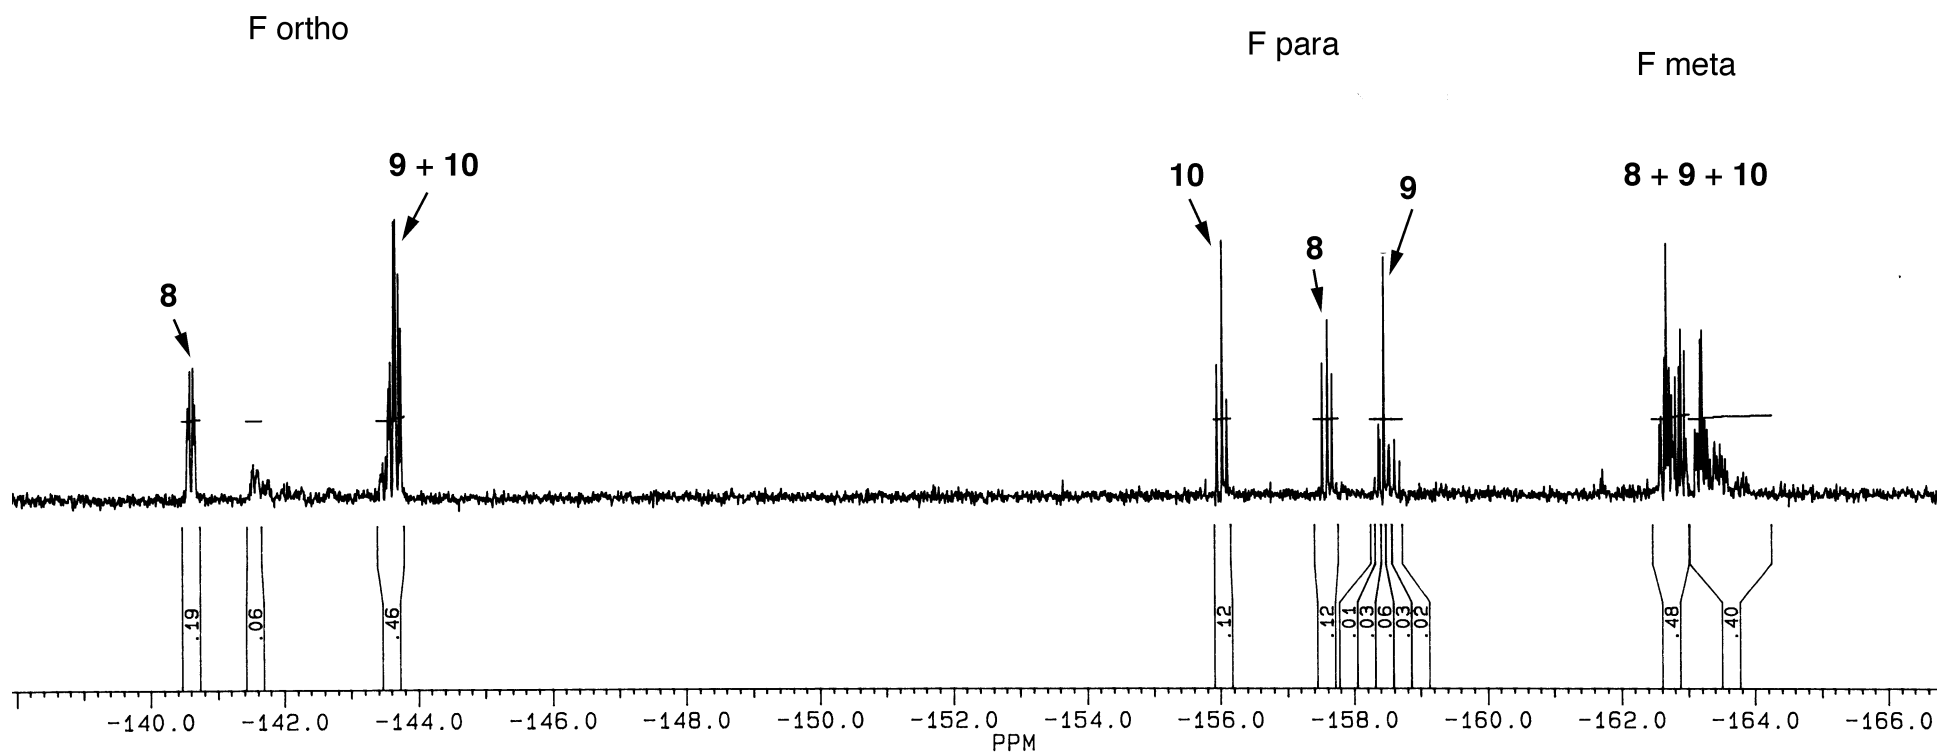

Decomposition mixture of cpd. **5** after 1 day at 50 °C  
<sup>1</sup>H NMR spectrum in CDCl<sub>3</sub>

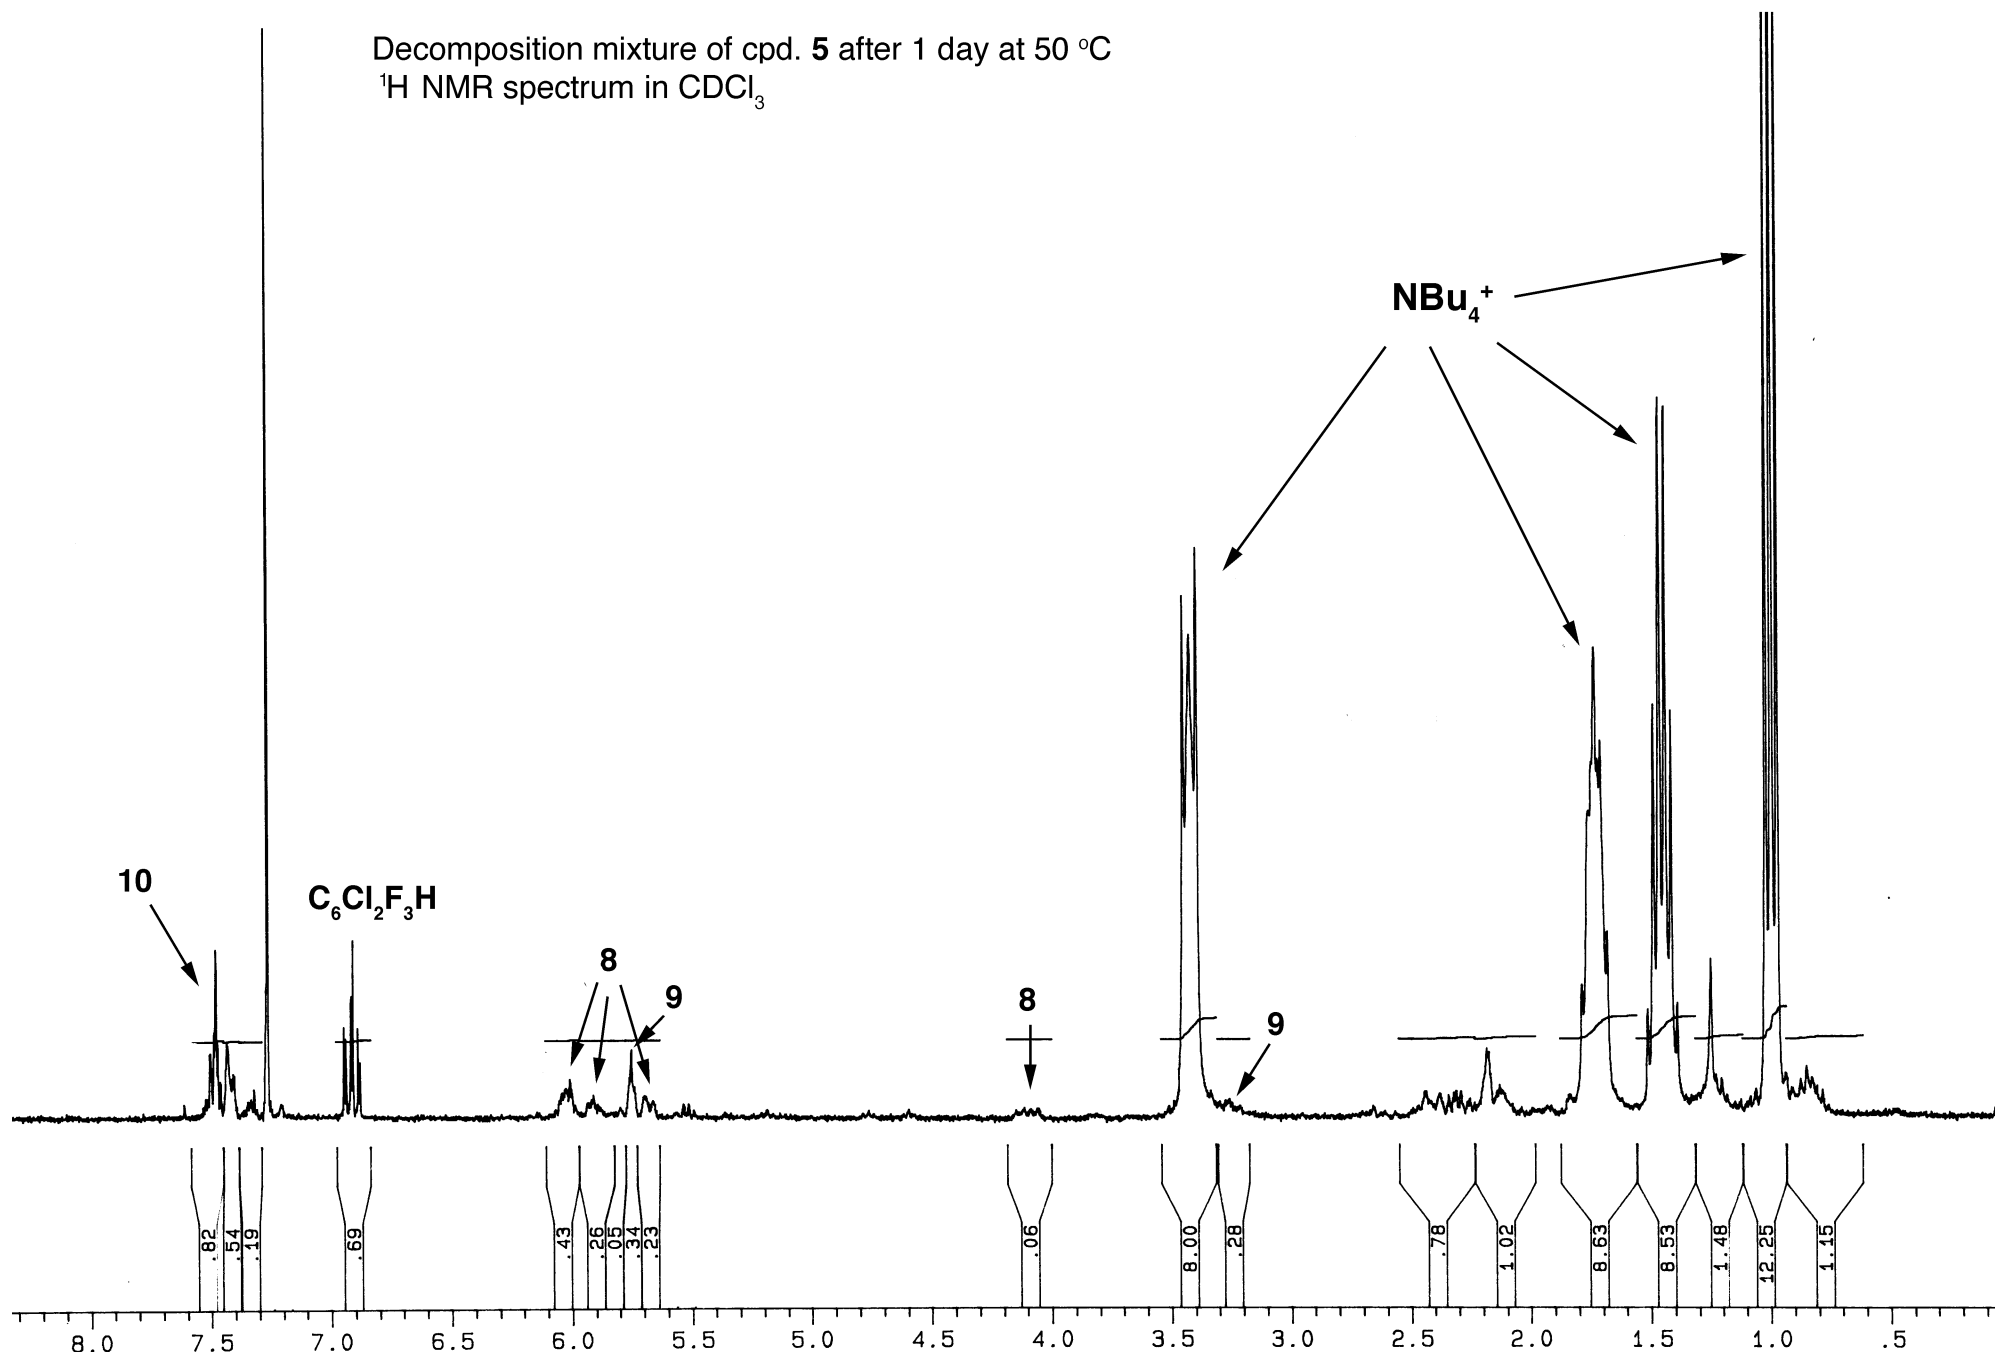

Decomposition mixture of cpd. 6 after 1 day at 50 °C  
 $^{19}\text{F}$  NMR spectrum in  $\text{CDCl}_3$

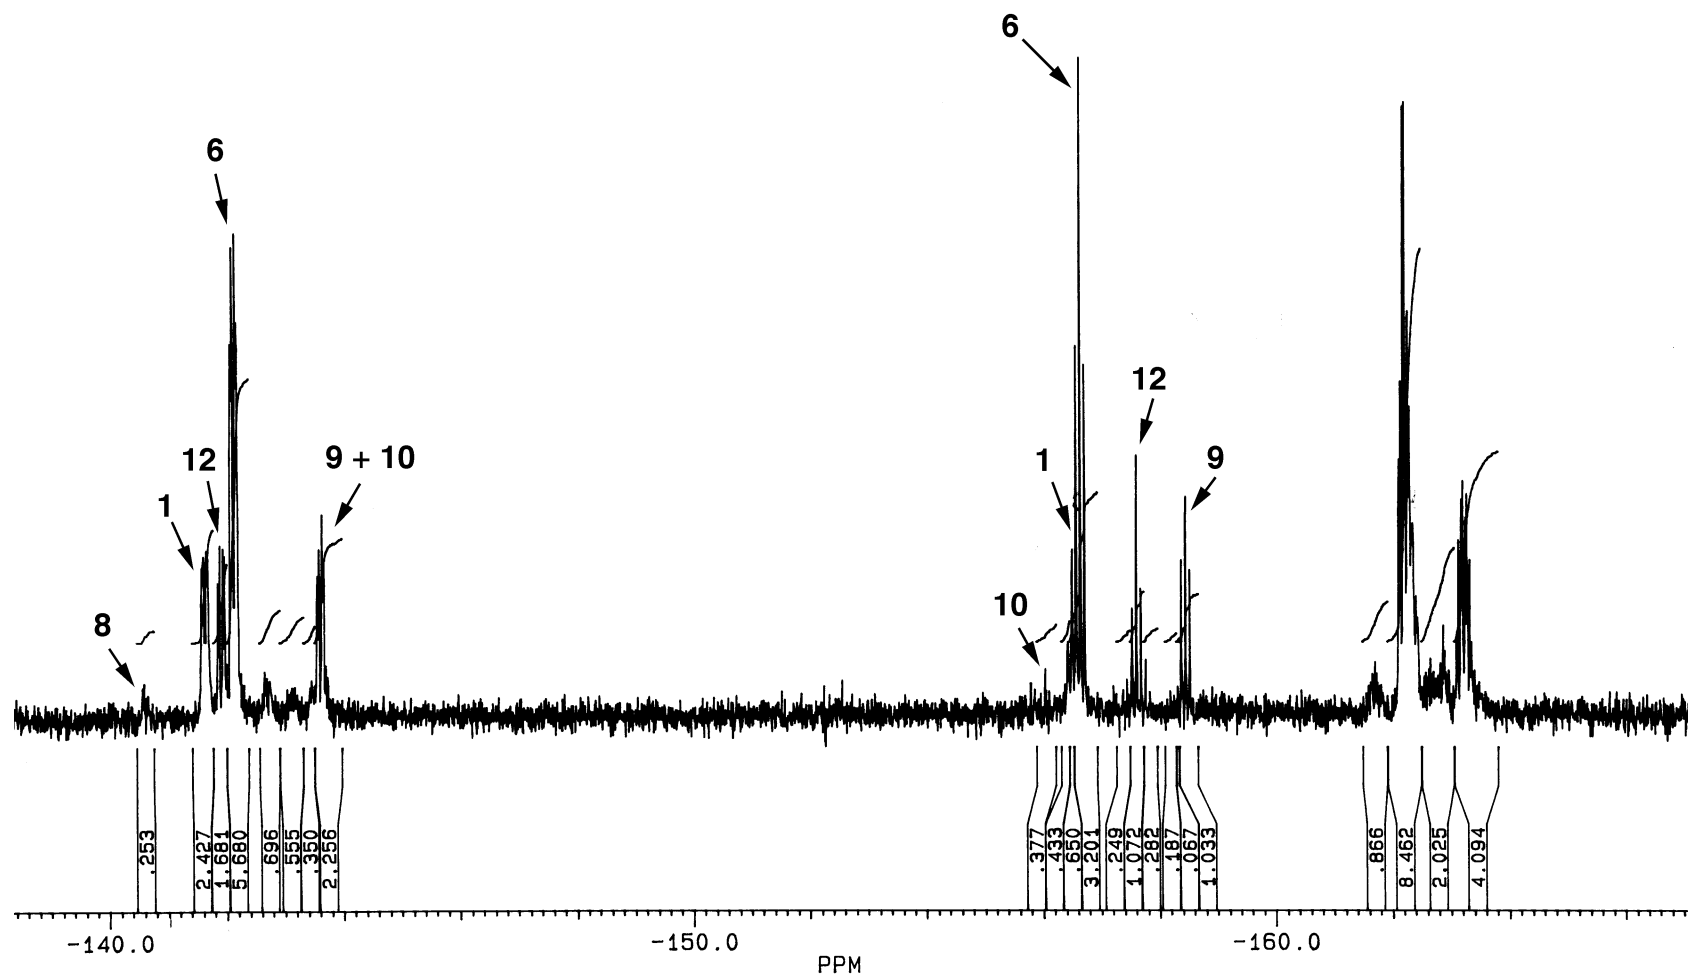

Decomposition mixture of cpd. **6** after 1 day at 50 °C  
<sup>1</sup>H NMR spectrum in CDCl<sub>3</sub>

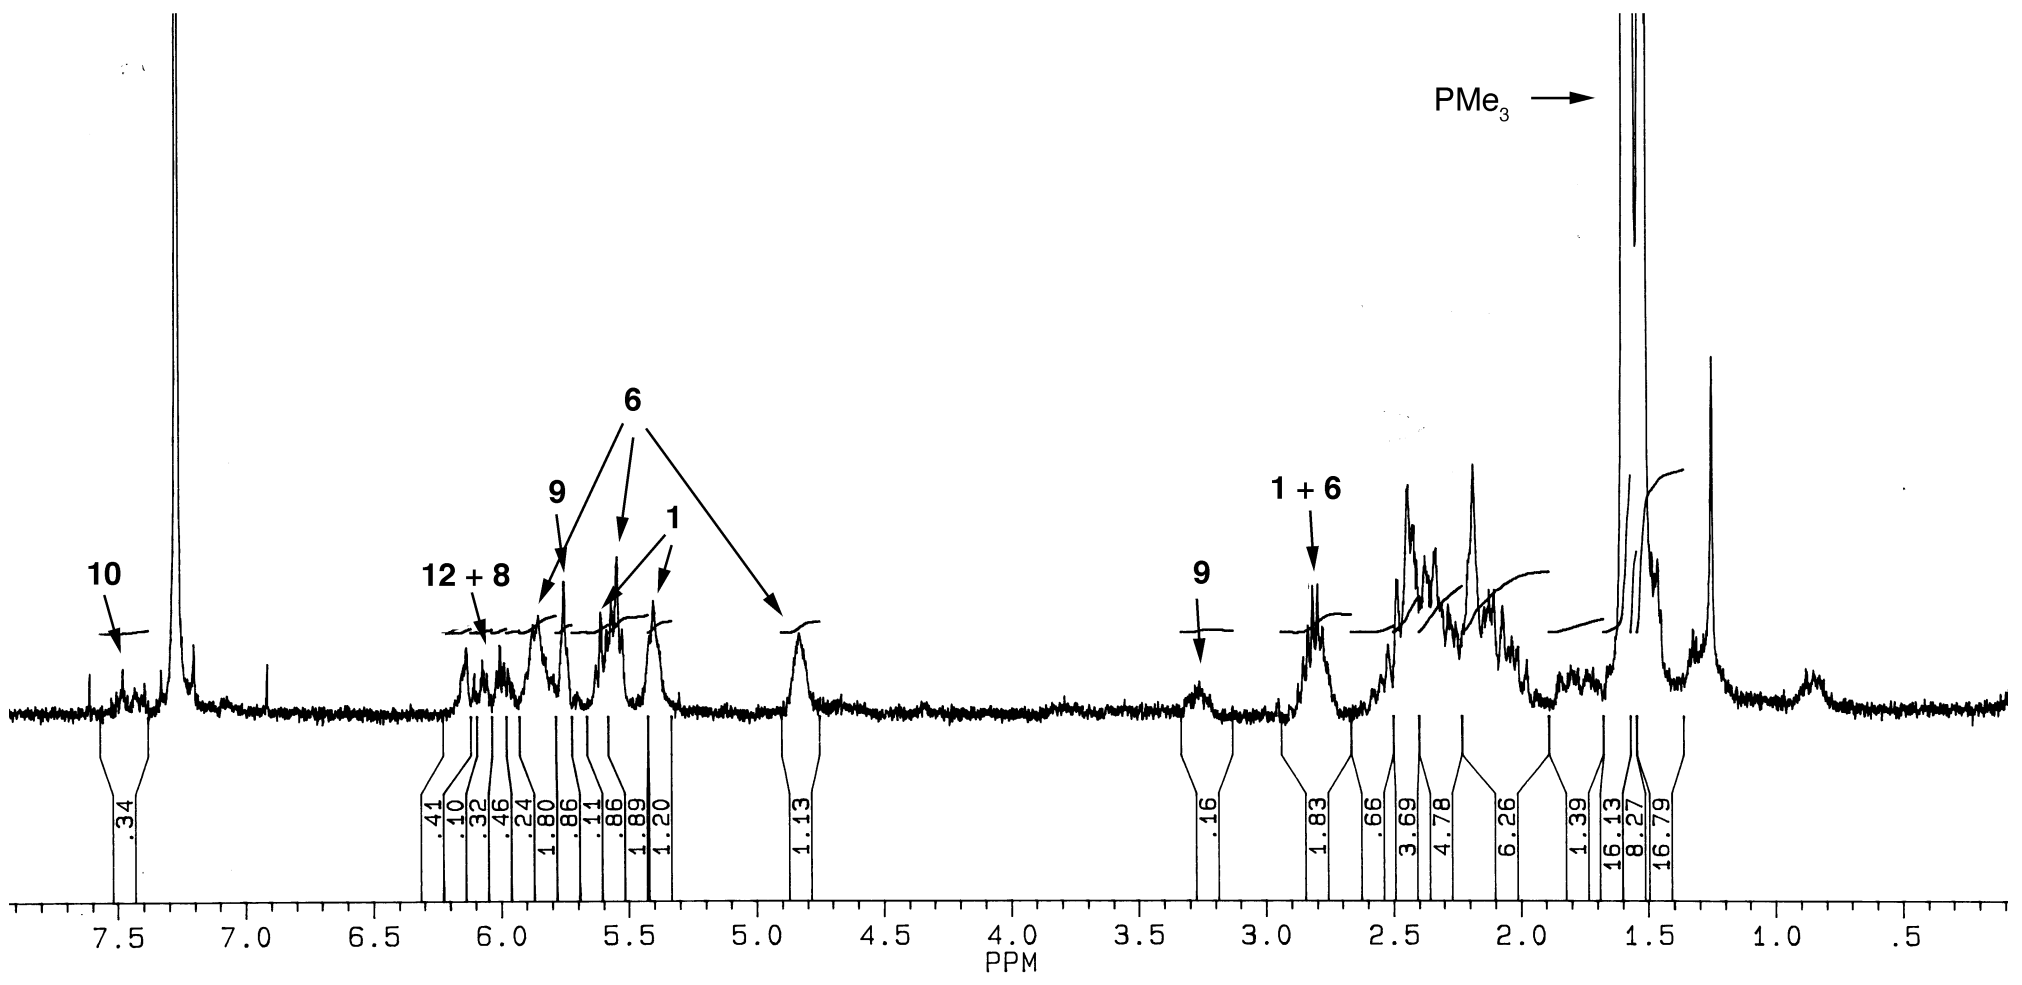

Supplement: b706817d.pdf [file b706817d.pdf]
